# Supplementary material for: Measuring underreporting and under-ascertainment in infectious disease datasets: a comparison of methods
Source: Springer Nature journal article supplement (doi:10.1186/1471-2458-14-147), 2014-02-11

A)

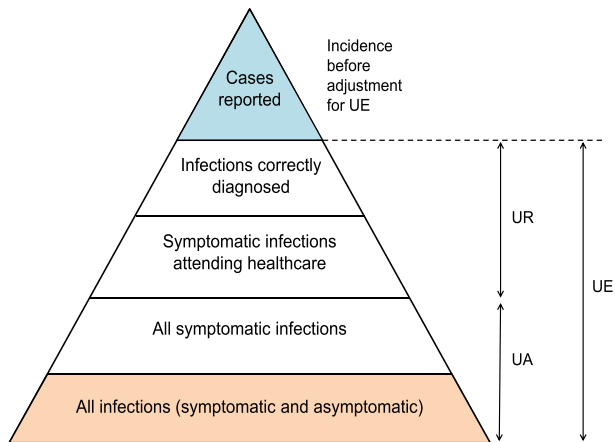

B)

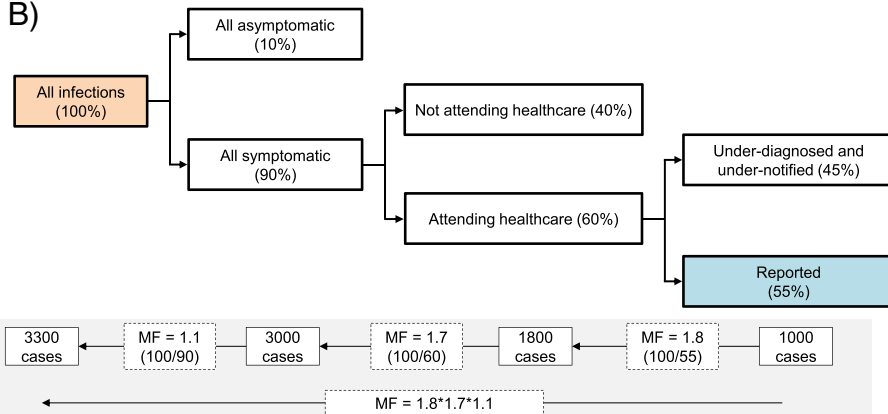

Supplement: 12889_2013_7494_MOESM1_ESM.pdf [file 12889_2013_7494_MOESM1_ESM.pdf]
